1 **New cycle, same old mistakes? Overlapping vs. discrete**  
2 **generations in long-term recurrent selection**

3

4 Marlee R. Labroo<sup>1</sup>, Jessica E. Rutkoski<sup>1\*</sup>

5

6 <sup>1</sup> Department of Crop Sciences, University of Illinois at Urbana-Champaign, 1102 S Goodwin Ave,  
7 Urbana, IL 61801

8

9

10 \*Corresponding author

11

12 E-mail addresses:

13 ML: [dulynoted713@gmail.com](mailto:dulynoted713@gmail.com)

14 JR: [jrut@illinois.edu](mailto:jrut@illinois.edu)

15

16

17

18

19

20

21

22

23

## 24 **Abstract**

25 **Background:** Recurrent selection is a foundational breeding method for quantitative trait  
26 improvement. It typically features rapid breeding cycles that can lead to high rates of genetic gain.  
27 In recurrent phenotypic selection, generations do not overlap, which means that breeding candidates  
28 are evaluated and considered for selection for only one cycle. With recurrent genomic selection,  
29 candidates can be evaluated based on genomic estimated breeding values indefinitely, therefore  
30 facilitating overlapping generations. Candidates with true high breeding values that were discarded  
31 in one cycle due to underestimation of breeding value could be identified and selected in subsequent  
32 cycles. The consequences of allowing generations to overlap in recurrent selection are unknown.  
33 We assessed whether maintaining overlapping and discrete generations led to differences in genetic  
34 gain for phenotypic, genomic truncation, and genomic optimum contribution recurrent selection by  
35 simulation of traits with various heritabilities and genetic architectures across fifty breeding cycles.  
36 We also assessed differences of overlapping and discrete generations in a conventional breeding  
37 scheme with multiple stages and cohorts.

38 **Results:** With phenotypic selection, overlapping generations led to decreased genetic gain  
39 compared to discrete generations due to increased selection error bias. Selected individuals, which  
40 were in the upper tail of the distribution of phenotypic values, tended to also have high absolute  
41 error relative to their true breeding value compared to the overall population. Without repeated  
42 phenotyping, these individuals erroneously believed to have high value were repeatedly selected  
43 across cycles, leading to decreased genetic gain. With genomic truncation selection, overlapping  
44 and discrete generations performed similarly as updating breeding values precluded repeatedly  
45 selecting individuals with inaccurately high estimates of breeding values in subsequent cycles.  
46 Overlapping generations did not outperform discrete generations in the presence of a positive  
47 genetic trend with genomic truncation selection, as past generations had lower mean genetic values

48 than the current generation of selection candidates. With genomic optimum contribution selection,  
49 overlapping and discrete generations performed similarly, but overlapping generations slightly  
50 outperformed discrete generations in the long term if the targeted inbreeding rate was extremely  
51 low.

52 **Conclusions:** Maintaining discrete generations in recurrent phenotypic selection leads to increased  
53 genetic gain, especially at low heritabilities, by preventing selection error bias. With genomic  
54 truncation selection and genomic optimum contribution selection, genetic gain does not differ  
55 between discrete and overlapping generations assuming non-genetic effects are not present.  
56 Overlapping generations may increase genetic gain in the long term with very low targeted rates of  
57 inbreeding in genomic optimum contribution selection.

## 58 **Background**

59 Quantitative trait improvement is achieved by cyclically increasing mean genetic  
60 value of breeding populations via recurrent selection. Recurrent phenotypic selection, reviewed by  
61 Hallauer & Darrah (1985), is a breeding strategy in which top-performing individuals are selected  
62 from a population and crossed to generate a new population for selection in the subsequent breeding  
63 cycle [1-3]. Recurrent phenotypic selection likely began with the invention of agriculture and is  
64 used to this day for quantitative trait improvement [3]. The advantage of this breeding strategy is  
65 that the breeding cycle length is short, as individuals can be selected as parents soon after they are  
66 born. Shorter cycle length leads to faster genetic gain, which is the rate of increase in mean genetic  
67 value due to selection in a population over time [4].

68 The main disadvantage of phenotypic selection is that selection accuracy tends to be  
69 low, because individuals are selected based on a single phenotypic observation, and selection  
70 accuracy directly impacts the rate of genetic gain [3]. This disadvantage is exacerbated at low trait  
71 heritabilities, as phenotypes are less indicative of true breeding values [5]. Different breeding

72 schemes to improve the accuracy of phenotypic selection have been developed which involve  
73 testing families of progeny of selection candidates (e.g. half-sibs, full-sibs, or inbred lines) across  
74 multiple replicates or environments [3]. Most applied breeding programs of cereal crops are  
75 currently practicing some form of recurrent selection among families, especially inbred families.  
76 While selection by family improves accuracy, it also increases the breeding cycle length, which  
77 limits the rate of genetic gain that can be realized.

78           With the availability of genomic selection, recurrent selection schemes are being  
79 modified to use genomic estimated breeding values (GEBVs) rather than single phenotypic  
80 observations for parent selection [7-10]. This is often referred to as “rapid-cycle genomic selection”  
81 [11]. This approach can improve selection accuracy without increasing the breeding cycle length,  
82 thus increasing the rate of genetic gain. Recurrent phenotypic and genomic selection fundamentally  
83 differ in that estimates of breeding value based on phenotype are defined at the individual level,  
84 whereas GEBVs are defined at the marker or population level [7]. In recurrent phenotypic selection,  
85 individuals are phenotyped once prior to selection, and this comprises the only assessment of the  
86 individuals’ breeding values. In genomic selection, observations of marker effects or genetic  
87 relationships increase in number as new relatives are phenotyped. Thus, the accuracy of estimates of  
88 individual breeding values increases with genomic prediction even in absence of additional  
89 phenotypic data for evaluated individuals [7]. For example, an individual with a high true breeding  
90 value may have a low estimated breeding value in a given genomic selection cycle due to error, but  
91 in a subsequent cycle its breeding value estimate may be higher—in better agreement with its true  
92 breeding value—as the prediction model is updated with information from relatives.

93           This raises the question: if possible, should individuals from previous selection cycles  
94 be considered again as selection candidates in subsequent cycles? Or, in other words, should  
95 generations be allowed to overlap in phenotypic and genomic recurrent selection programs?

96 Conventionally, individuals are only considered as candidates for selection during the cycle when  
97 they are evaluated. However, in clonally propagated or perennial species, individuals could be  
98 selected directly as parents for multiple seasons. In self-compatible species with multiple  
99 inflorescences, selected individuals could be self-pollinated and the resultant seed could be used for  
100 crossing in multiple selection cycles, even though the selfed progeny would not be identical to the  
101 parent genotype. In practice, it is common for plant breeders to recycle favored parents across  
102 cycles of selection, leading to overlap, even if the parent has not been phenotyped and statistically  
103 evaluated alongside the current selection candidates. The effect on genetic gain of maintaining  
104 discrete or overlapping selection generations has not been formally evaluated or reported. Given  
105 that selection accuracy may vary with cycle in breeding individuals from previous generations in  
106 genomic but not phenotypic selection, we hypothesized that allowing overlapping generations may  
107 be more favorable for rapid recurrent genomic selection compared to rapid recurrent phenotypic  
108 selection. Unexpectedly, we found that overlapping generations decreased the rate of genetic gain  
109 under phenotypic selection compared to discrete generations.

110 This study had two primary objectives: 1) to determine if generations should be  
111 overlapping or discrete in phenotypic and genomic recurrent selection programs, and 2) to  
112 determine in what selection scenarios overlapping and discrete generations can be recommended for  
113 recurrent selection. The effects of overlapping and discrete generations on the inbreeding rate,  
114 average parental age, and the selection accuracy were also examined.

## 115 **Methods**

116 Stochastic simulations in the R package AlphaSimR were conducted to examine  
117 various recurrent selection scenarios [12]. All simulations were run on the Biocluster High  
118 Performance Computing system housed in the Carl R. Woese Institute for Genomic Biology at the  
119 University of Illinois at Urbana-Champaign and maintained by the Computer Network Resource

120 Group. Two main trait and pipeline architectures were considered: 1) recurrent selection on a purely  
121 additive trait in a single cohort per breeding cycle (RS-A), and 2) recurrent selection on a trait with  
122 additive, year, and additive x year effects with multiple cohorts per breeding cycle (RS-AY). For  
123 both architectures, an outbred, diploid, hermaphroditic founder population was generated with the  
124 *runMac3* function. Individuals had ten chromosomes with 1,000 segregating sites per chromosome.

125           For the RS-A scenarios, with the purely additive trait, 100 sites per chromosome were  
126 assigned additive effects and 50 sites per chromosome were genotyped by a simulated SNP-chip.  
127 Additional File 1 contains the script used to generate the base founder population. To start each  
128 simulation replicate, 100 individuals were drawn from the founder population. Starting mean  
129 genetic value was 0, genetic variance was 1, error variance was 4, and narrow-sense heritability was  
130 either 0.1, 0.5, or 0.9. In the first year, 20 parents were selected phenotypically. See Additional File  
131 2 for the script used to start each simulation. After the first year, a breeding cycle consisted of  
132 crossing the selected parents, phenotypic evaluation and parent selection before flowering, then  
133 restarting the cycle by making 100 random crosses of the selected parents which produced 1  
134 progeny per cross (Fig. 1).

135           Several factors were considered in the RS-A scenario (Fig. 2). Parents were selected  
136 from either discrete or overlapping generations. For discrete generations, parents were only selected  
137 from the current breeding cycle. For overlapping generations, parents were selected from any  
138 breeding cycle. Then, the selection on either phenotypic value, true genetic value, or GEBV as  
139 estimated by ridge regressed best linear unbiased prediction (RR-BLUP) was used. In phenotypic  
140 selection only, selection on either unreplicated phenotypes or thrice-replicated phenotypes was  
141 considered; in all other cases, phenotypes were unreplicated. In the case of genomic selection only,  
142 truncation vs. optimum contribution selection (OCS), as well as training the model on all  
143 generations (allGen) vs. training on the most recent previous five generations (fiveGen) to mimic

144 what may occur in practical situations were also considered (Fig. 2). If selection occurred on  
145 phenotype or true genetic value, truncation selection of the top 20 individuals was always used. In  
146 the genomic selection scenarios, either truncation selection of the top 20 individuals was used or  
147 OCS was used with minimum effective population sizes ( $N_e$ ) of 10, 45, and 90. Higher minimum  
148 effective population size implied stricter control of inbreeding. OCS was implemented with the R  
149 package *optiSel* [13]. All RS-A scenarios were run for 50 breeding cycles and replicated across 10  
150 simulations. See Additional File 1 for custom *optiSel* functions used in the study, and see  
151 Additional File 3 for the core script used to run the RS-A simulations.

152           For the RS-AY scenario, with selection on an additive, year, and additive x year trait  
153 and multiple cohorts per cycle, a modification of the general breeding scheme of the Conventional  
154 Program described in Gaynor et al., 2017, was used [14]. As in the RS-A scenarios, 100 segregating  
155 sites per chromosome were assigned additive effects, and 50 sites per chromosome were genotyped  
156 by a simulated SNP-chip. To start each simulation replicate, 100 individuals were drawn from the  
157 founder population. Starting mean genetic value was 0, and genetic variance was 1. Additional File  
158 4 contains the script used to start the RS-AY scenarios, and Additional File 5 contains a script to  
159 store the year effects. Phenotypes in subsequent stages were simulated using a custom R script  
160 according to the assumptions of a compound symmetry model. Phenotypes were not simulated with  
161 the Finlay-Wilkinson model, which is the default in *AlphaSimR* for traits with genotype x  
162 environment interactions. Year effects were drawn from a normal distribution with mean 0 and  
163 variance 0.2. Additive x year effects for each site were drawn from a normal distribution with mean  
164 0 and variance scaled to achieve the targeted total additive x year variance of 0.2. As such, the  
165 variance of the distribution from which the additive x year effects were drawn was the variance of  
166 the additive marker effects times the targeted additive x year variance of 0.2 divided by the genetic  
167 variance of 1 in the base population. Plot error effects were drawn from a normal distribution with

168 mean 0 and variance scaled to achieve variable broad-sense heritabilities at each stage in the  
169 breeding cycle, with heritability increasing at later stages compared to earlier stages. The  
170 heritabilities used differed from those in Gaynor et al., 2017 [14]. Phenotypes were the sum of the  
171 additive, year, additive x year, and plot error effects.

172           For the RS-AY scenario, 30 selected parents entered the breeding pipeline at stage 1  
173 and were crossed randomly into 100 biparental crosses with 97 progeny each. In stage 2, doubled  
174 haploid lines were produced from each of the year 1 progeny. In stage 3, the doubled haploid lines  
175 were phenotyped in headrows from which 500 individuals are advanced. In stage 4, the 500  
176 individuals advanced from stage 3 were then phenotyped in a preliminary yield trial, and 50  
177 individuals were advanced. In stage 5, the 50 individuals advanced from stage 4 entered an  
178 advanced yield trial, from which 10 individuals were advanced. In stage 6, the 10 individuals  
179 advanced from stage 5 were phenotyped in an elite yield trial, and all individuals were advanced. In  
180 stage 7, all individuals from stage 6 were reevaluated in the second year of the elite yield trial. In  
181 stage 8, a single variety was chosen from the elite yield trials. In RS-AY scenarios with discrete  
182 generations, the 20 top-ranked individuals from stage 4 and all individuals from stage 5 of the most  
183 recent cycle were selected as parents (modified from Gaynor et al., 2017, in which the crossing  
184 block was composed of the 20 top-ranked individuals from stage 4, the 10 top-ranked individuals  
185 from stage 5, and also the 20 best individuals from the crossing block of the previous cycle, which  
186 implicitly allowed overlapping generations) [14]. In scenarios with overlapping generations, the 20  
187 top-ranked individuals from stage 4 and the 10 top-ranked individuals from stage 5 were selected as  
188 parents from all cycles conducted in the breeding program. In the genomic selection scenarios, all  
189 records from stages 4-7 from all cycles conducted in the breeding program comprised the training  
190 set, regardless of whether generations were overlapping or discrete. Each stage was assumed to take  
191 one year. The breeding program was run for 40 years. The scripts to run each RS-AY scenario are



192 located in Additional Files 6—9.

193           For each parent selection scenario in RS-A, mean genetic value was always recorded  
194 in the current generation of individuals in a given cycle to examine the genetic trend due to  
195 selection. For RS-AY, mean genetic value was recorded in the current generation of parents in a  
196 given year. For both situations, selection error bias, mean genomic inbreeding, selection accuracy,  
197 and average parental age were also recorded in the selected parents of the current generation only.  
198 Selection error bias per cycle was the ratio of absolute error in the selected parents to absolute error  
199 in all selection candidates, where error was the deviation of the phenotype or GEBV from the true  
200 genetic value. For RS-AY, selection error bias was decomposed into component error due to year,  
201 additive x year, and plot error. The ratio of each absolute component error in the selected parents to  
202 absolute component error in all selection candidates was the selection error bias for the component.  
203 Mean genomic inbreeding per cycle was the average probability of allelic identity-by-descent  
204 between pairs of individuals, where identity-by-descent was tracked directly via the *setTrackRec()*  
205 option rather than estimated. Selection accuracy was Pearson's correlation of GEBV or phenotype  
206 and the simulated true breeding value (TBV). By definition, selection accuracy was one for  
207 scenarios with selection on TBV. See Additional File 10 for the raw response variables from each  
208 simulation replicate and cycle (for RS-A) or year (for RS-AY).

209           To test for differences in responses by scenario for RS-A, time points representing the  
210 short-term, medium-term, and long-term were chosen as cycle 5, cycle 25, and cycle 45  
211 respectively. For RS-AY, differences in responses were only interrogated at the terminal year 40.  
212 The RS-A and RS-AY scenarios were considered separate experiments. The RS-AY experiment  
213 was conceived subsequently to RS-A in order to explore additional sources of selection error bias  
214 (i.e. year and genotype x year effects).

215 For each time point, and for all responses studied except mean parental age and year  
216 error bias, the following linear model was constructed with the R package nlme:

$$217 \quad Y_{ij} = \mu + S_i + R_{j(i)} + \varepsilon_{ij}$$

218  $Y_{ij}$  was the response of interest for the  $i^{\text{th}}$  scenario and the  $j^{\text{th}}$  simulation replicate,  $\mu$  was the grand  
219 mean,  $S_i$  was the fixed effect of the  $i^{\text{th}}$  scenario,  $R_{j(i)}$  was the random effect of the  $j^{\text{th}}$  simulation  
220 nested in the  $i^{\text{th}}$  scenario with  $N(0, \sigma_{j(i)}^2)$ , and  $\varepsilon_{ij}$  was the random residual error with  $N(0, R\sigma_\varepsilon^2)$   
221 where  $\sigma_\varepsilon^2$  was the error variance, and  $R$  was a matrix whose diagonal was a weighting factor used to  
222 model unique error variances for each scenario [15]. Differences in means by scenario were tested  
223 by the *anova.lme* function in nlme [15]. Pre-planned contrasts of differences in responses by  
224 scenario were made at  $\alpha = 0.05$  with the *pairs* function in the R packages emmeans for the discrete  
225 vs. overlapping variations of otherwise identical scenarios [16, 17]. Contrasts for OCS at  $N_e = 10$   
226 were not possible in the long term because the optimization of GEBV and mean genomic  
227 inbreeding ceased to solve around cycle 35.

228 Because mean parental age in the selected individuals was uniformly one with no  
229 variance in the RS-A discrete scenarios, Student's *t* test was conducted with the *t.test* function in R  
230 to test whether mean parental age at each timepoint significantly differed from  $\mu = 1$  for each  
231 overlapping scenario at  $\alpha = 0.05$  subject to Bonferroni correction given the number of tests in the  
232 family. Because mean parental age for the RS-AY discrete scenarios was uniformly 3.67, Student's  
233 *t* test was conducted as above to test whether mean parental age significantly differed from  $\mu =$   
234 3.67. Similarly, because year error bias was uniformly one with no variance in the RS-AY discrete  
235 scenarios, Student's *t* test was used to examine whether mean year error bias significantly differed  
236 from  $\mu = 1$  for the RS-AY overlapping scenarios at  $\alpha = 0.05$  subject to Bonferroni correction given

237 the number of tests in the family. (Year error bias was 1 in the discrete scenarios because all  
238 candidates were evaluated in the same year and therefore had the same year value.)

## 239 **Results**

### 240 *Genetic trends*

241 In the RS-A case, significant differences in mean genetic value by scenario were  
242 observed (Additional File 11). In terms of mean genetic value, unreplicated discrete phenotypic  
243 selection outperformed unreplicated overlapping phenotypic selection in the long term for all  
244 heritabilities, and in the medium term if  $h^2 = 0.1$  or  $0.5$  (Fig. 3; Additional File 12). Performance of  
245 unreplicated discrete and overlapping phenotypic selection did not significantly differ in the short  
246 term (Fig. 3; Additional File 12). If phenotyping was replicated three times, then discrete  
247 phenotypic selection outperformed overlapping in the long and medium term if  $h^2 = 0.1$  or  $0.5$ , and  
248 in the short term if  $h^2 = 0.1$  only (Fig. 3; Additional File 12). In contrast, if true genetic value was  
249 used for selection, then mean genetic value of discrete vs. overlapped selection did not differ  
250 significantly at any timepoint.

251 Discrete and overlapping generations appeared to perform similarly with genomic  
252 selection in the RS-A scenarios (Fig. 3; Additional File 12—13). The exceptions were that  
253 overlapping generations always outperformed discrete generations with OCS at  $N_e = 100$  and  $h^2 =$   
254  $0.5$  or  $0.9$  regardless of training set used, and in the long term discrete generations outperformed  
255 overlapping with OCS at  $N_e = 45$  and  $h^2 = 0.9$  with training on the previous five generations  
256 (Additional File 12—13). Also, in the short term, overlapping generations outperformed discrete  
257 with OCS at  $N_e = 100$  at  $h^2 = 0.5$  or  $0.9$  with training on the previous five generations as well as  
258 training on all generations (Additional File 12—13).

259                    In the RS-AY case, significant differences in mean genetic value by scenario were  
260 observed at year 40 (Additional File 11). Discrete genomic selection outperformed overlapping  
261 genomic selection, and discrete phenotypic selection outperformed overlapping phenotypic  
262 selection (Fig. 4; Additional File 12).

### 263 *Selection error bias*

264                    For the RS-A cases, significant differences in mean selection error bias by scenario  
265 were observed (Additional File 11). For unreplicated phenotypic selection, selection error bias was  
266 always higher in overlapping selection scenarios, except in the short- and medium-term for  $h^2 = 0.9$   
267 (Fig. 5; Additional File 12). Notably, this pattern mirrors the observed trend in mean genetic value.  
268 If phenotyping was replicated three times, selection error bias remained higher in overlapping  
269 generations in the same scenarios as unreplicated phenotypic selection (Fig. 5; Additional File 12).  
270 With selection on true genetic value, by definition selection error bias did not differ between  
271 overlapping and discrete generations, as error for all candidates was zero (Fig. 5). For genomic  
272 truncation selection, selection error bias also did not differ between overlapping and discrete  
273 scenarios at any point if the training set was composed of all generations (Fig. 5; Additional File  
274 12). However, if the training set was composed of the previous five generations, then selection error  
275 bias in overlapping scenarios was significantly higher than discrete in the long-term with genomic  
276 truncation selection (Additional File 12, 14).

277                    For genomic OCS with the training set composed of all generations, discrete and  
278 overlapping selection error bias did not significantly differ except in the short and medium term if  
279  $N_e = 100$  and  $h^2 = 0.5$  or  $0.9$ , in which case overlapping selection error bias was significantly higher  
280 (Additional File 12, 14). If the training set was composed of the previous five generations, then in  
281 the short term selection error bias did not significantly differ except at  $N_e = 100$  for  $h^2 = 0.5$  or  $0.9$ ,  
282 in which case overlapping selection had a higher selection error bias (Additional File 12, 14). In the

283 medium and long term with training on the previous five generations, discrete always had higher  
284 selection error bias than overlapping (Additional File 12, 14).

285           For the RS-AY cases, significant differences in mean selection error bias by scenario  
286 were observed (Additional File 11). Discrete phenotypic selection had significantly lower selection  
287 error bias than overlapping phenotypic selection, but no significant difference was observed for  
288 discrete vs. overlapping genomic selection (Fig. 6; Additional File 12). Significant differences in  
289 additive x year error bias and plot error bias were also observed (Fig. 6; Additional File 11).  
290 Discrete phenotypic selection had significantly lower additive x year error bias than overlapping  
291 phenotypic selection, but no significant difference was observed for discrete vs. overlapping  
292 genomic selection (Fig. 6; Additional File 12). On the other hand, plot error bias was significantly  
293 lower for discrete vs. overlapping phenotypic selection and discrete vs. overlapping genomic  
294 selection (Fig. 6; Additional File 12). Year error bias significantly differed from 1 with overlapping  
295 phenotypic selection, but did not significantly differ from 1 with overlapping genomic selection  
296 (Fig. 6; Additional File 13).

### 297 *Mean genomic inbreeding*

298           Significant differences in mean genomic inbreeding by scenario were observed in the  
299 RS-A cases (Additional File 11). For unreplicated and thrice-replicated phenotypic selection, mean  
300 genomic inbreeding was significantly higher with discrete selection at  $h^2 = 0.1$  at all time points but  
301 did not significantly differ for other heritabilities (Additional File 12, 15, 16). Mean genomic  
302 inbreeding did not significantly differ with selection on true genetic value (Additional File 12, 17).  
303 For genomic truncation selection with training on all generations, no significant differences in mean  
304 inbreeding were observed between discrete and overlapping scenarios except in the long term at  $h^2$   
305 = 0.9, for which overlapping generations led to higher inbreeding than discrete (Additional File 12,  
306 18). With training on the previous five generations, overlapping truncation genomic selection led to

307 higher inbreeding in the short term at  $h^2 = 0.1$  and in the medium term at  $h^2 = 0.5$  and  $0.9$ , but with  
308 no significant differences in the long term (Additional File 12, 19).

309           With genomic OCS, discrete selection sometimes led to higher inbreeding than  
310 overlapping selection despite optimization of the inbreeding rate. With training on all generations,  
311 this occurred for  $h^2 = 0.1$  in the medium term for  $N_e = 10$  and the short and medium terms for  $N_e =$   
312  $45$ , but did not occur for  $N_e = 100$  (Additional File 12, 20—22). For  $h^2 = 0.5$ , this occurred in the  
313 medium term for  $N_e = 10$ , and the medium and long term for  $N_e = 45$  (Additional File 12, 20—21).  
314 However, in the short and medium term at  $h^2 = 0.5$  with training on all generations, overlapping led  
315 to higher inbreeding than discrete at  $N_e = 100$  (Additional File 12, 22). For  $h^2 = 0.9$ , discrete  
316 selection led to higher inbreeding in the short and medium term at  $N_e = 10$ , the medium term at  $N_e =$   
317  $45$ , and the short term only at  $N_e = 100$  (Additional File 12, 20—22).

318           With genomic OCS and training on the previous five generations, discrete selection  
319 led to higher rates of inbreeding in the medium and long term at  $h^2 = 0.1$  for all levels of  $N_e$ , and  
320 additionally in the short term for  $N_e = 45$  (Additional File 12, 23—25). At  $h^2 = 0.5$ , discrete  
321 selection again led to higher inbreeding in the short term if  $N_e = 45$  and the medium term for  $N_e =$   
322  $45$  and  $100$  only (Additional File 12, 24—25). At  $h^2 = 0.9$ , discrete selection led to higher  
323 inbreeding rates in the short term for  $N_e = 10$ , lower inbreeding rates in the short term if  $N_e = 100$ ,  
324 higher inbreeding rates in the medium and long term for  $N_e = 45$ , and higher inbreeding rates in the  
325 short and long term for  $N_e = 100$  (Additional File 12, 23—25).

326           With RS-AY, significant differences in mean genomic inbreeding by scenario were  
327 also present at year 40 (Additional File 11). Discrete phenotypic selection led to significantly higher  
328 inbreeding than overlapping phenotypic selection, and discrete genomic selection also led to  
329 significantly higher inbreeding than overlapping genomic selection (Additional File 12, 26).

330 *Genetic variance*

331           Significant differences in mean genetic variance by scenario were observed in RS-A  
332 (Additional File 11). For unreplicated phenotypic selection, significant differences in genetic  
333 variance in the current generation were only observed at  $h^2 = 0.1$  in the medium and long term, with  
334 overlapping selection maintaining higher genetic variance (Additional File 12, 15). For replicated  
335 phenotypic selection, genetic variance was significantly lower with overlapped selection only in the  
336 long term at  $h^2 = 0.1$  (Additional File 12, 16). No significant differences in genetic variance were  
337 observed for selection on true genetic value (Additional File 12, 17). For genomic truncation  
338 selection, no significant differences in genetic variance were observed regardless of training set or  
339 heritability (Additional File 12, 18—19).

340           For genomic OCS, no significant differences in genetic variance were observed if all  
341 generations were used in the training set (Additional File 12, 20—22). If the previous five  
342 generations were used in the training set, then at all heritabilities overlapping selection maintained  
343 greater genetic variance than discrete in the medium term if  $N_e = 100$  only, while if  $N_e = 45$   
344 overlapping had higher genetic variance only if  $h^2 = 0.5$  or  $0.9$  (Additional File 12, 23—25). In the  
345 long term, overlapping selection maintained greater genetic variance if  $N_e = 45$  at  $h^2 = 0.1$  or  $0.9$ ,  
346 and if  $N_e = 100$  at all heritabilities (Additional File 12, 23—25).

347           For the RS-AY scenarios, significant differences in genetic variance were observed  
348 among scenarios (Additional File 11). Discrete genomic selection had significantly higher genetic  
349 variance than overlapping genomic selection, whereas discrete phenotypic selection led to  
350 significantly lower genetic variance than overlapping phenotypic selection (Additional File 12, 26).

351 *Selection accuracy*

352           Significant differences in mean selection accuracy by scenario were observed in the  
353 RS-A cases (Additional File 11). Selection accuracy, as measured in the selected parents of the

354 current generation per cycle, did not significantly differ between overlapping and discrete  
355 generations with replicated or unreplicated phenotypic selection (Additional File 12, 15—16). For  
356 selection on true genetic value, selection accuracy was by definition 1 for both discrete and  
357 overlapping generations. For genomic truncation selection, no differences in accuracy among  
358 overlapping and discrete generations were observed regardless of training set (Additional File 12,  
359 18—19).

360 In genomic OCS, with the training set composed of all generations, selection accuracy  
361 was higher for overlapping generations in the short term if  $N_e = 100$  and  $h^2 = 0.5$  (Additional File  
362 12, 22). Overlapping generations also had higher accuracies in the medium term if  $h^2 = 0.5$  and  $N_e =$   
363 45. (Additional File 12, 21). No significant differences were observed in the long term for OCS  
364 with training on all generations (Additional File 20—22). In genomic OCS with training on the  
365 previous five generations only, overlapping selection had higher selection accuracy in the short term  
366 only if  $h^2 = 0.5$  or  $0.9$  and  $N_e = 100$  (Additional File 12, 25). In the medium term, overlapping  
367 selection had higher accuracies at all levels of  $N_e$  for  $h^2 = 0.1$ , but only at  $N_e = 45$  or  $100$  for  $h^2 = 0.5$   
368 or  $0.9$  (Additional File 12, 23—25). In the long term, overlapping selection had higher accuracies at  
369 all levels of  $h^2$  and  $N_e$  observed with OCS and training on the previous five generations (Additional  
370 File 12, 23—25).

371 In the RS-AY cases, significant differences in mean selection accuracy were observed  
372 by scenario (Additional File 11). Discrete phenotypic selection produced higher selection accuracy  
373 than overlapping phenotypic selection, and discrete genomic selection produced higher selection  
374 accuracy than overlapping genomic selection (Additional File 12, 26).

### 375 *Mean parental age*

376 By definition, the age of the selected parents under discrete generations was always  
377 one in the RS-A scenarios. Both thrice-replicated and unreplicated overlapping phenotypic



378 truncation selection always resulted in mean parental age significantly greater than 1 for  
379 overlapping relative to discrete generations (Additional File 15—16, 28). Interestingly, selection on  
380 true genetic value always resulted in mean parental age significantly greater than 1 with overlapping  
381 generations in the long term, and in the medium term with  $h^2 = 0.5$  (Additional File 17, 28). With  
382 genomic truncation selection and training on all generations, mean parental age was always higher  
383 with overlapping generations (Additional File 18, 28). With truncation selection and training on the  
384 previous five generations, overlapping generations had significantly higher mean parental age  
385 except in the medium term at  $h^2 = 0.1$  (Additional File 19, 28). With genomic OCS and training on  
386 all generations, mean parental age in overlapping scenarios was not significantly different from  
387 discrete at  $N_e = 10$  in the medium term only, but was significantly higher in the short and long terms  
388 (Additional File 20—22, 28). Mean parental age was always significantly higher than discrete for  $N_e$   
389 = 45 and 100 with genomic OCS and training on all generations (Additional File 21—22, 28). With  
390 genomic OCS and training on the previous five generations, mean parental age did not significantly  
391 differ between overlapping and discrete generations if  $N_e = 10$  in the short term (Additional File 23,  
392 28). However, at all other timepoints and levels of  $N_e$  overlapping selection led to significantly  
393 higher mean parental age than discrete (Additional File 23—25, 28).

394           In the RS-AY scenarios, mean parental age was 3.67 years under discrete selection.  
395 For the overlapping scenarios, mean parental age was significantly greater than 3.67 years with both  
396 phenotypic and genomic selection (Additional File 26—27).

## 397 **Discussion**

398           The possibility of allowing generations to overlap in recurrent selection is not often  
399 considered. Although recycling a preferred parent across generations is common in applied  
400 breeding programs, nonpreferred individuals are generally discarded permanently. Here, the

401 underlying theoretical basis for practicing discrete as opposed to overlapping recurrent phenotypic  
402 selection is demonstrated. Mean magnitude of error in selected individuals is larger than mean  
403 magnitude of error in the overall population, creating selection error bias. Over breeding cycles,  
404 selection error bias causes the magnitude of selection error to increase in phenotypically selected  
405 populations with overlapping generations. This propagation of selection error results in decreased  
406 genetic gain, whereas with discrete phenotypic selection the population recovers each cycle because  
407 the magnitude of the deviation of observed phenotypic value from true genetic value remains  
408 random in the selected individuals. Maintaining discrete generations in phenotypic selection  
409 prevents making the “same old mistakes” of selecting individuals erroneously believed to be  
410 exceptional repeatedly across cycles.

411           Notably, at higher heritabilities, the propagation of error takes more cycles to affect  
412 gain because the phenotypes of selected individuals deviate less from their true breeding value  
413 compared to at lower heritabilities. Discrete generations still outperformed overlapping generations  
414 if phenotypic observations were replicated three times, though the relative outperformance was  
415 slightly less than without replication as phenotypic value deviated less from true genetic value.  
416 However, with selection on true genetic value, no differences in mean genetic value were observed  
417 between discrete and overlapping generations, as is expected in absence of selection error.

418           The propagation of error under overlapping phenotypic selection can be thought of as  
419 failure to observe regression to a mean when individuals are not adequately evaluated; phenotypes  
420 at the tails of a distribution, far from the mean, are on average more likely to have larger  
421 magnitudes of error (Fig. 7). In breeding for population improvement, individuals in the upper tail  
422 of the phenotypic distribution—and outliers beyond the upper tail of the distribution—are  
423 inherently of interest. Many phenotypes are in the tails of the distribution due to error. In selection  
424 from discrete generations the total number of outliers is small, whereas in selection from

425 overlapping generations the total number of outliers grows as breeding cycles are completed and  
426 total number of selection candidates grows. Thus, the number of highly erroneous phenotypes  
427 selected as parents is limited under discrete selection, and this restriction causes discrete phenotypic  
428 selection to outperform overlapping phenotypic selection. Though only three-fold replication of  
429 phenotypes is tested here, using additional replicates of phenotypic value should further restrict  
430 propagation of error in overlapping generations.

431           The effect of overlapping vs. discrete generations in genomic truncation selection has  
432 not been previously evaluated to the authors' knowledge. Mean genetic value does not significantly  
433 differ in discrete and overlapping genomic truncation selection, in contrast to phenotypic selection.  
434 Addition of new data to the model with each generation of genomic selection eliminates the  
435 problem of error propagation observed in phenotypic selection, as estimates of breeding value are  
436 improved by replicated observations of allele-phenotype combinations (which is synonymous with  
437 observations of more relatives). Though we hypothesized that overlapping generations might lead to  
438 more genetic gain than discrete as accuracy of GEBVs increased in older individuals with  
439 phenotyping of progeny, this was not the case due to the positive genetic trend from selection [18].  
440 In other words, older individuals tended to have lower true genetic values than younger individuals  
441 in the presence of effective selection, so any increase in accuracy did not result in increased gain.  
442 Generally, the mean parental age did not substantially increase in overlapping genomic truncation  
443 selection compared to discrete (although the small increase observed was significant), indicating  
444 that parents with the best GEBVs were usually from the most recent generation or most recent past  
445 generations.

446           Because we observed in previous simulations that overlapping truncation selection  
447 underperformed discrete selection at high heritabilities in the long term due to inbreeding, we tested  
448 whether controlling genomic inbreeding by OCS led to greater mean genetic values in overlapping

449 than discrete OCS scenarios. It is also well-established that genomic selection requires genomic  
450 control of inbreeding for maximal long-term gain, and at times genomic control of inbreeding can  
451 increase short-term gain relative to truncation selection [19-22]. However, we did not generally  
452 observe that overlapping selection outperformed discrete selection in OCS scenarios except at  
453 relatively high effective population size and high heritability. Interestingly, there is an explicit  
454 penalty to use of individuals from past generations in OCS due not to their genetic values but rather  
455 their addition to the rate of inbreeding [21]. If overlapping generations are allowed, control of  
456 inbreeding generally results from increasing the number of parents selected and not from increasing  
457 the generation interval in canonical OCS [18]. Thus, in contrast to genomic truncation selection, the  
458 relatively similar performance of overlapping and discrete OCS is likely due to the control of  
459 inbreeding as well as balance of gain per cycle and increased selection accuracy per cycle. With  
460 OCS at high  $N_e$  and  $h^2 = 0.5$  or  $0.9$ , overlapping generations always had higher mean genetic values  
461 than discrete. This may indicate that overlapping generations allow more flexibility than discrete in  
462 balancing increases in inbreeding and genetic gain when inbreeding was more strictly constrained,  
463 as more individuals with more combinations of genetic value and relatedness were available to meet  
464 the constraints imposed. This is in agreement with the observation of Villanueva et al. (2000) that  
465 the optimal generation interval was higher with more stringent restrictions on inbreeding, as well as  
466 use of fewer parents [22].

467           As demonstrated in the RS-AY scenarios, error can propagate from any source with  
468 overlapping phenotypic selection— year error, genotype x year interaction error, or random plot  
469 error. Because we simulated greater plot error variance than year or genotype x year variance in  
470 stages from which parents were selected, we observed relatively more selection error bias due to  
471 plot error than other sources with overlapping phenotypic selection. Increasing the variance of the  
472 year or genotype x year values would likely increase their relative contributions to overall selection

473 error; in applied breeding programs, the relative contribution of each source of error depends on the  
474 program. Additionally, we expect that selection error bias is not specific to plant breeding and can  
475 occur in other cyclical systems in which repeated selection occurs in the presence of random  
476 observational error.

477           The propagation of error was not restricted by movement of cohorts through  
478 advancement stages alone in the RS-AY scenario; restriction of propagation of error was  
479 accomplished by use of a statistical method to estimate breeding value. In the RS-AY scenarios, we  
480 only tested use of RR-BLUP to estimate breeding value. We expect that other estimation methods  
481 without a relationship matrix (e.g. best linear unbiased prediction) should restrict propagation of  
482 error if multi-year observations are available, as in the RS-AY scenario. However, if multiple  
483 observations are not available (as in the RS-A scenario), then estimation methods without  
484 relationship matrices would not restrict propagation of error.

485           To build on the conclusions of this study, it would be useful to test relative  
486 performance of overlapping and discrete generations under different genomic selection schemes,  
487 such as the modified reciprocal recurrent selection practiced in commercial hybrid breeding  
488 programs. Testing non-additive genetic architectures may also be relevant. Though speculative, it  
489 would also be interesting to test discrete and overlapping generations with multi-trait genomic  
490 selection. We hypothesize that in cases where multiple objectives are to be optimized (e.g. multiple  
491 phenotypic traits with different trait architectures), overlapping generations may provide more  
492 combinations of traits within genomic selection candidates and increase multi-trait gain.

## 493 **Conclusions**

494           Based on the trends observed, generations should be kept discrete under recurrent  
495 mass phenotypic selection to avoid decreased genetic gain due to selection error bias. With genomic

496 truncation selection, we observed no advantage to allowing overlapping generations under the  
497 assumptions used, though with genomic OCS it appeared the overlapping generations allowed more  
498 effective control of inbreeding than discrete generations at high effective population sizes with low  
499 targeted inbreeding rates.

## 500 **Declarations**

### 501 **Ethics approval and consent to participate**

502 Not applicable.

### 503 **Consent for publication**

504 Not applicable.

### 505 **Availability of data and materials**

506 All data generated or analysed during this study are included in this published article and its  
507 supplementary information files.

### 508 **Competing interests**

509 The authors declare that they have no competing interests.

### 510 **Funding**

511 This work was supported by the Jonathan Baldwin Turner fellowship of the University of Illinois  
512 College of ACES and the Crop Sciences Department.

### 513 **Authors' contributions**

514 ML executed the study, wrote code for analysis, interpreted data, and drafted the manuscript. JR  
515 discovered selection error bias, wrote code for analysis, interpreted data, and edited the manuscript.

516 Both authors read and approved the final manuscript.

### 517 **Acknowledgements**

518 We thank Anthony J. Studer for advising and supporting ML throughout the course of this work.

519 We thank Stephen P. Moose, Daniel Davidson, and David Slater for providing computational

520 resources which enabled the study. We thank R. Chris Gaynor for developing AlphaSimR and  
521 providing code to model compound symmetry. We thank the anonymous reviewers of this work for  
522 their insights.

523

## 524 **References**

- 525 1. Duvick, D. N. (1996). Plant breeding, an evolutionary concept. *Crop Science*, 36(3), 539-  
526 548.
- 527 2. Harlan, J. R., De Wet, J. M. J., & Price, E. G. (1973). Comparative evolution of  
528 cereals. *Evolution*, 27(2), 311-325.
- 529 3. Hallauer, A. R., & Darrah, L. L. (1985). Compendium of recurrent selection methods and  
530 their application. *Critical Reviews in Plant Sciences*, 3(1), 1-33.
- 531 4. Eberhart, S. A. (1970). Factors effecting efficiencies of breeding methods. *African*  
532 *soils*, 15(1/3), 655-680.
- 533 5. Lee, E. A., & Tracy, W. F. (2009). Modern maize breeding. In *Handbook of Maize* (pp. 141-  
534 160). Springer, New York, NY.
- 535 6. Dudley, J. W. (2007). From means to QTL: The Illinois long-term selection experiment as  
536 a case study in quantitative genetics. *Crop Science*, 47, S-20.
- 537 7. Lorenz, A. J., Chao, S., Asoro, F. G., Heffner, E. L., Hayashi, T., Iwata, H., ... & Jannink, J.  
538 L. (2011). Genomic selection in plant breeding: knowledge and prospects. In *Advances in*  
539 *agronomy* (Vol. 110, pp. 77-123). Academic Press.
- 540 8. Goddard, M. E., & Hayes, B. J. (2007). Genomic selection. *Journal of Animal breeding and*  
541 *Genetics*, 124(6), 323-330.
- 542 9. Heffner, E. L., Sorrells, M. E., & Jannink, J. L. (2009). Genomic selection for crop  
543 improvement. *Crop Science*, 49(1), 1-12.

- 544 10. Jannink, J. L., Lorenz, A. J., & Iwata, H. (2010). Genomic selection in plant breeding: from  
545 theory to practice. *Briefings in functional genomics*, 9(2), 166-177.
- 546 11. Heslot, N., Jannink, J. L., & Sorrells, M. E. (2015). Perspectives for genomic selection  
547 applications and research in plants. *Crop Science*, 55(1), 1-12.
- 548 12. Faux, A. M., Gorjanc, G., Gaynor, R. C., Battagin, M., Edwards, S. M., Wilson, D. L., ... &  
549 Hickey, J. M. (2016). AlphaSim: software for breeding program simulation. *The plant*  
550 *genome*, 9(3), 1-14.
- 551 13. Wellmann, R. (2019). Optimum contribution selection for animal breeding and  
552 conservation: the R package optiSel. *BMC bioinformatics*, 20(1), 1-13.
- 553 14. Gaynor, R. C., Gorjanc, G., Bentley, A. R., Ober, E. S., Howell, P., Jackson, R., ... &  
554 Hickey, J. M. (2017). A two-part strategy for using genomic selection to develop inbred  
555 lines. *Crop Science*, 57(5), 2372-2386.
- 556 15. Pinheiro, J., Bates, D., DebRoy, S., & Sarkar, D. (2017). R Core Team (2017) nlme: linear  
557 and nonlinear mixed effects models. R package version 3.1-131.
- 558 16. Lenth, R., Singmann, H., Love, J., Buerkner, P., & Herve, M. (2018). Emmeans: Estimated  
559 marginal means, aka least-squares means. *R package version*, 1(1), 3.
- 560 17. Hothorn, T., Bretz, F., Westfall, P., Heiberger, R. M., Schuetzenmeister, A., Scheibe, S., &  
561 Hothorn, M. T. (2016). Package ‘multcomp’. *Simultaneous inference in general parametric*  
562 *models. Project for Statistical Computing, Vienna, Austria*.
- 563 18. Villanueva, B., Bijma, P., & Woolliams, J. A. (2000). Optimal mass selection policies for  
564 schemes with overlapping generations and restricted inbreeding. *Genetics Selection*  
565 *Evolution*, 32(4), 1-17.
- 566 19. Meuwissen, T. H. E. (1997). Maximizing the response of selection with a predefined rate of  
567 inbreeding. *Journal of animal science*, 75(4), 934-940.



- 568 20. Jannink, J. L. (2010). Dynamics of long-term genomic selection. *Genetics Selection*  
569 *Evolution*, 42(1), 35.
- 570 21. Meuwissen, T. H. E., & Sonesson, A. K. (1998). Maximizing the response of selection with  
571 a predefined rate of inbreeding: overlapping generations. *Journal of animal science*, 76(10),  
572 2575-2583.
- 573 22. Woolliams, J. A., Berg, P., Dagnachew, B. S., & Meuwissen, T. H. E. (2015). Genetic  
574 contributions and their optimization. *Journal of Animal Breeding and Genetics*, 132(2), 89-  
575 99.

## 576 **Figures**

### 577 **Figure 1 Overview of recurrent mass selection scheme for RS-A scenarios**

578 For the RS-A scenarios, only the parental selection units varied in this study. For an overview of the  
579 RS-AY scenarios, see the Conventional scenario in Gaynor et al., 2017 [14].

### 580 **Figure 2 Overview of the RS-A scenario factors**

581 Shaded boxes indicate factors and unshaded boxes indicate levels of factors. Solid lines connecting  
582 shaded boxes indicate that all combinations of factor levels were tested, while solid lines connecting  
583 unshaded factor levels to shaded factors indicate the subsequent shaded factors only apply to the  
584 connected factor level.

### 585 **Figure 3 Mean genetic value for selected RS-A scenarios**

586 Mean genetic value per cycle for the RS-A scenarios of phenotypic selection, thrice-replicated  
587 phenotypic selection, genomic truncation selection with all generations used in the training set  
588 (allGen truncation), and selection on true genetic value. Values are surrounded by the 95%  
589 confidence interval of the cycle mean.

### 590 **Figure 4 Mean genetic value for RS-AY scenarios**

591 Mean genetic value per cycle for the RS-AY scenarios of phenotypic selection and genomic  
592 selection surrounded by the 95% confidence interval of the cycle mean.

593 **Figure 5 Selection error bias for selected RS-A scenarios**

594 Selection error bias per cycle for the RS-A scenarios of phenotypic selection, thrice-replicated  
595 phenotypic selection, genomic truncation selection with all generations used in the training set  
596 (allGen truncation), and selection on true genetic value. Values are surrounded by the 95%  
597 confidence interval of the cycle mean.

598 **Figure 6 Selection error bias for RS-AY scenarios**

599 Selection error bias per cycle for the RS-AY scenarios of phenotypic selection and genomic  
600 selection surrounded by the 95% confidence interval of the cycle mean. Overall selection error bias  
601 is show as well as error bias due to year, additive x year, and plot error.

602 **Figure 7 Selection error bias illustration**

603 Phenotypic values, true genetic values, and errors of selected and unselected individual candidates  
604 at  $h^2 = 0.1$  in the first cycle of overlapping phenotypic selection for the RS-A pipeline. The  
605 magnitude of error is greater at the tails of the phenotypic values, including the upper tail from  
606 which individuals are selected.

607 **Additional files**

608 **Additional file 1**

609 Format: R programming language (.R)

610 Title: Script to generate base population

611 Description: R script used to generate the base population used in the study with the AlphaSimR  
612 package. Also contains custom optiSel functions used in the study.

613 **Additional file 2**

614 Format: R programming language (.R)

615 Title: Script to start RS-A simulations

616 Description: R script to initiate the RS-A simulations

617 **Additional file 3**

618 Format: R programming language (.R)

619 Title: Script to run RS-A simulations

620 Description: R script to run the RS-A simulations

621 **Additional file 4**

622 Format: R programming language (.R)

623 Title: Script to start RS-AY simulations

624 Description: R script to initiate the RS-AY simulations

625 **Additional file 5**

626 Format: R programming language (.R)

627 Title: Script to draw RS-AY year effects

628 Description: R script to save year effects for the RS-AY simulations

629 **Additional file 6**

630 Format: R programming language (.R)

631 Title: R script for RS-AY overlapping phenotypic selection scenario

632 Description: R script to run the simulation for the RS-AY phenotypic selection with overlapping

633 generations scenario

634 **Additional file 7**

635 Format: R programming language (.R)

636 Title: R script for RS-AY discrete phenotypic selection scenario

637 Description: R script to run the simulation for the RS-AY phenotypic selection with discrete

638 generations scenario

639 **Additional file 8**

640 Format: R programming language (.R)

641 Title: R script for RS-AY overlapping genomic selection scenario

642 Description: R script to run the simulation for the RS-AY genomic selection with overlapping

643 generations scenario

644 **Additional file 9**

645 Format: R programming language (.R)

646 Title: R script for RS-AY discrete genomic selection scenario

647 Description: R script to run the simulation for the RS-AY genomic selection with discrete

648 generations scenario

649 **Additional file 10**

650 Format: Microsoft Excel Workbook (.xlsx)

651 Title: Raw Simulation Results

652 Description: Excel file containing response values for all variable, cycles or years, and simulation

653 replicates for the RS-A and RS-AY scenarios. See metadata tab for additional information.

654 **Additional file 11**

655 Format: Microsoft Word Document (.docx)

656 Title: Analyses of variance

657 Description: Results for all analyses of variance described in the study.

658 **Additional file 12**

659 Format: Microsoft Excel Workbook (.xlsx)

660 Title: Contrasts

661 Description: Results for all contrasts described in the study.

662 **Additional file 13**

663 Format: Microsoft Word Document (.docx)

664 Title: RS-A Mean Genetic Values, Supplementary

665 Description: Plots of mean genetic value by cycle surrounded by 95% confidence intervals for the

666 RS-A scenarios with genomic truncation selection and training on the previous five generations

667 (fiveGen Trunc) as well as all RS-A OCS scenarios.

668 **Additional file 14**

669 Format: Microsoft Word Document (.docx)

670 Title: RS-A Selection Error Bias, Supplementary

671 Description: Plots of selection error bias by cycle surrounded by 95% confidence intervals for the

672 RS-A scenarios with genomic truncation selection and training on the previous five generations

673 (fiveGen Trunc) as well as all RS-A OCS scenarios.

674 **Additional file 15**

675 Format: Microsoft Word Document (.docx)

676 Title: RS-A Phenotypic Selection: All Responses

677 Description: Plots of all responses recorded for the RS-A phenotypic selection scenario.

678 **Additional file 16**

679 Format: Microsoft Word Document (.docx)

680 Title: RS-A Phenotypic 3rep Selection: All Responses

681 Description: Plots of all responses recorded for the RS-A phenotypic 3rep selection scenario.

682 **Additional file 17**

683 Format: Microsoft Word Document (.docx)

684 Title: RS-A True Genetic Value: All Responses

685 Description: Plots of all responses recorded for the RS-A true genetic value selection scenario.

686 **Additional file 18**

687 Format: Microsoft Word Document (.docx)

688 Title: RS-A allGen Trunc: All Responses

689 Description: Plots of all responses recorded for the RS-A genomic truncation selection with training  
690 on all previous generations scenario (allGen Trunc).

691 **Additional file 19**

692 Format: Microsoft Word Document (.docx)

693 Title: RS-A fiveGen Trunc: All Responses

694 Description: Plots of all responses recorded for the RS-A genomic truncation selection with training  
695 on the previous five generations scenario (fiveGen Trunc).

696 **Additional file 20**

697 Format: Microsoft Word Document (.docx)

698 Title: RS-A allGen OCS Ne = 10: All Responses

699 Description: Plots of all responses recorded for the RS-A genomic optimum contribution selection  
700 with training on all previous generations scenario at Ne = 10 (allGen OCS Ne = 10)

701 **Additional file 21**

702 Format: Microsoft Word Document (.docx)

703 Title: RS-A allGen OCS Ne = 45: All Responses

704 Description: Plots of all responses recorded for the RS-A genomic optimum contribution selection  
705 with training on all previous generations scenario at Ne = 45 (allGen OCS Ne = 45)

706 **Additional file 22**

707 Format: Microsoft Word Document (.docx)

708 Title: RS-A allGen OCS Ne = 100: All Responses

709 Description: Plots of all responses recorded for the RS-A genomic optimum contribution selection  
710 with training on all previous generations scenario at Ne = 100 (allGen OCS Ne = 100)

711 **Additional file 23**

712 Format: Microsoft Word Document (.docx)

713 Title: RS-A fiveGen OCS Ne = 10: All Responses

714 Description: Plots of all responses recorded for the RS-A genomic optimum contribution selection

715 with training on the previous five generations scenario at Ne = 10 (fiveGen OCS Ne = 10)

716 **Additional file 24**

717 Format: Microsoft Word Document (.docx)

718 Title: RS-A fiveGen OCS Ne = 45: All Responses

719 Description: Plots of all responses recorded for the RS-A genomic optimum contribution selection

720 with training on the previous five generations scenario at Ne = 45 (fiveGen OCS Ne = 45)

721 **Additional file 25**

722 Format: Microsoft Word Document (.docx)

723 Title: RS-A fiveGen OCS Ne = 100: All Responses

724 Description: Plots of all responses recorded for the RS-A genomic optimum contribution selection

725 with training on the previous five generations scenario at Ne = 100 (fiveGen OCS Ne = 100)

726 **Additional file 26**

727 Format: Microsoft Word Document (.docx)

728 Title: RS-AY: All Responses

729 Description: Plots of all responses recorded for the RS-AY scenarios, including both phenotypic

730 and genomic selection.

731 **Additional file 27**

732 Format: Microsoft Word Document (.docx)

733 Title: RS-AY Student's *t*-tests

734 Description: Results of Student's *t*-tests conducted for the RS-AY year error bias and mean parental  
735 age responses.

736 **Additional file 28**

737 Format: Microsoft Word Document (.docx)

738 Title: RS-A Student's *t*-tests

739 Description: Results of Student's *t*-tests conducted for the RS-A mean parental age responses.



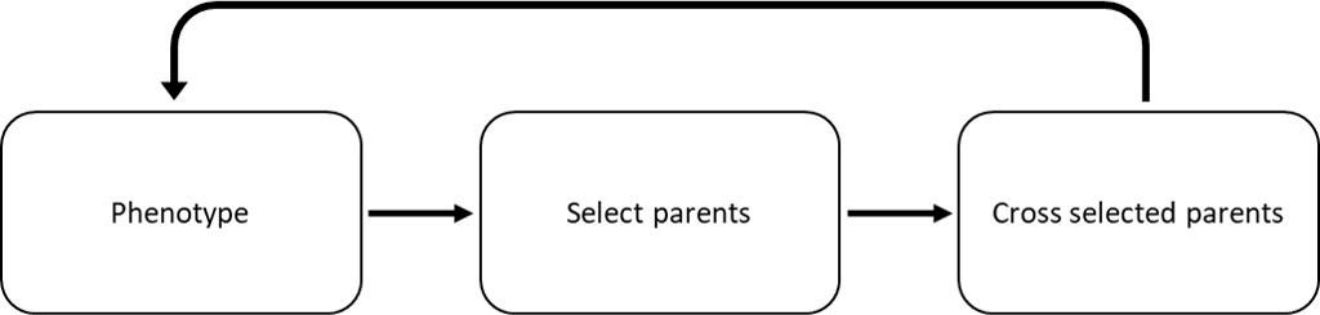

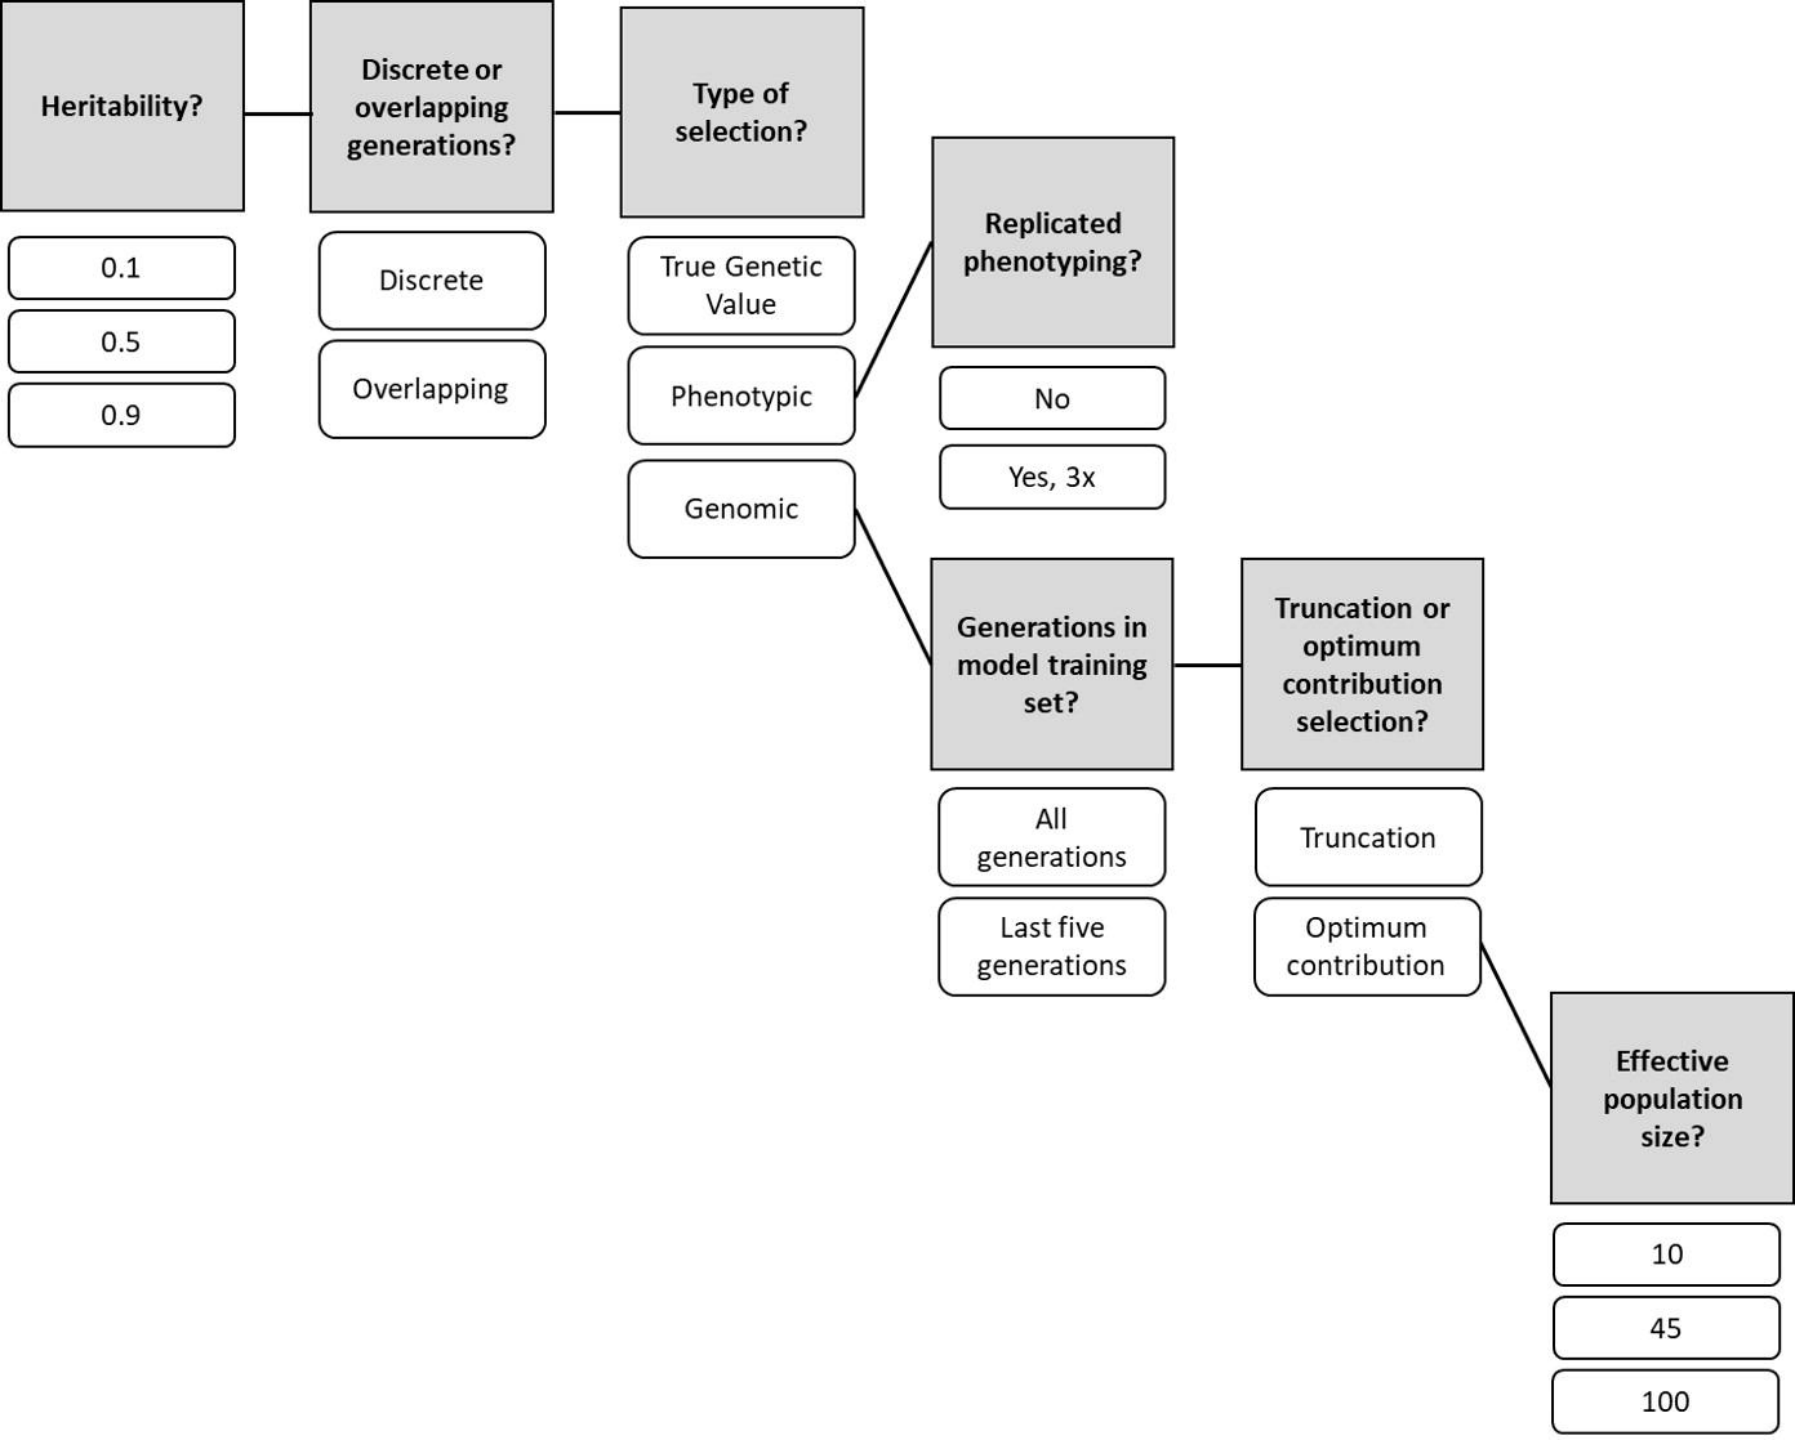

# RS-A Mean Genetic Value

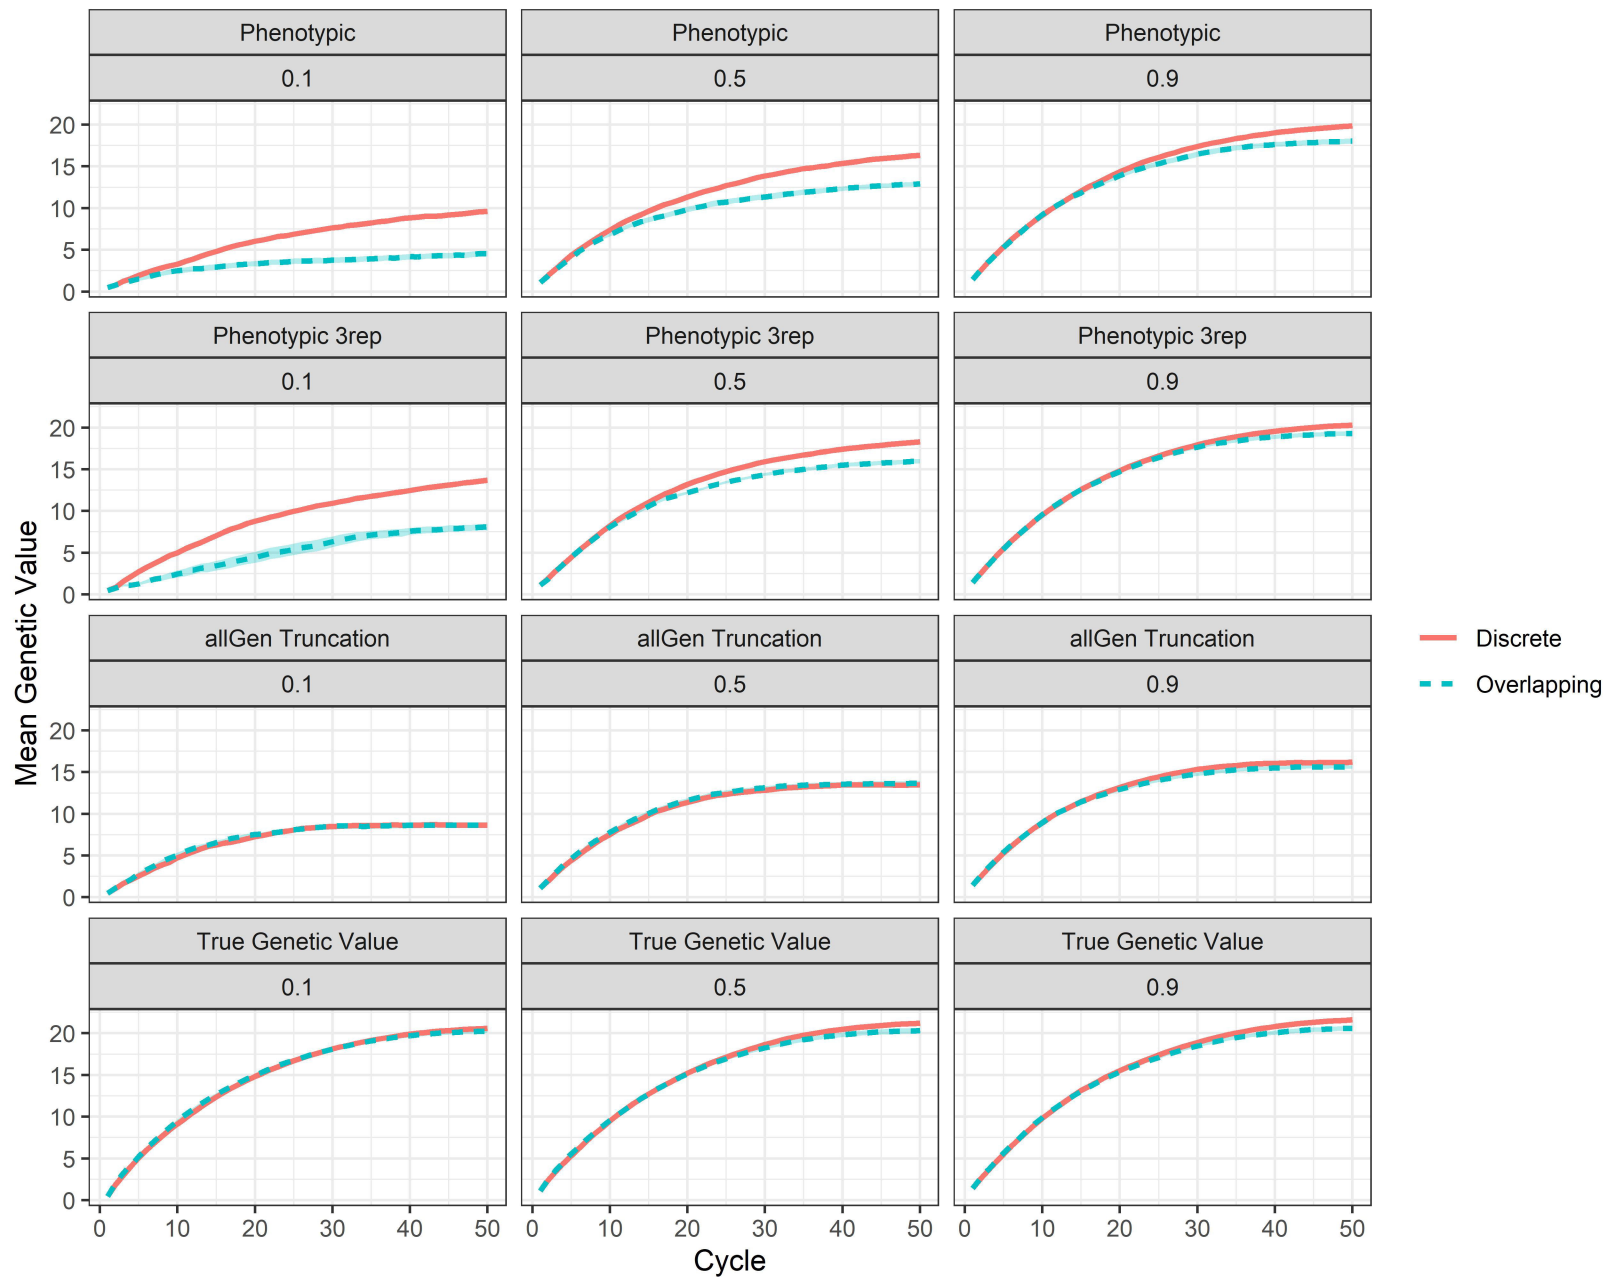

# RS-AY Mean Genetic Value

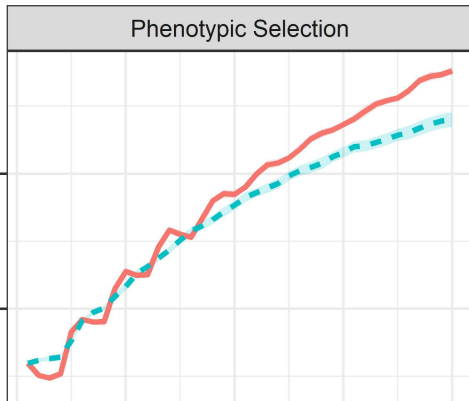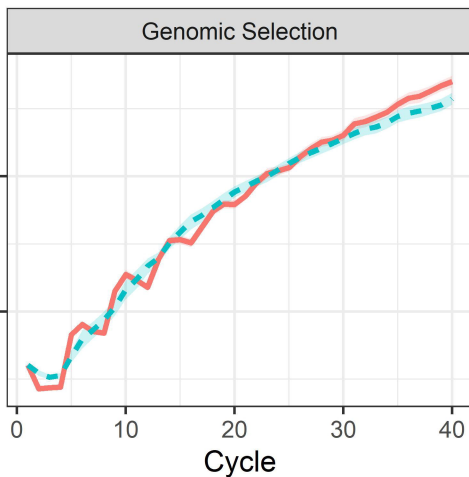

- Discrete
- Overlapping

# RS-A Selection Error Bias

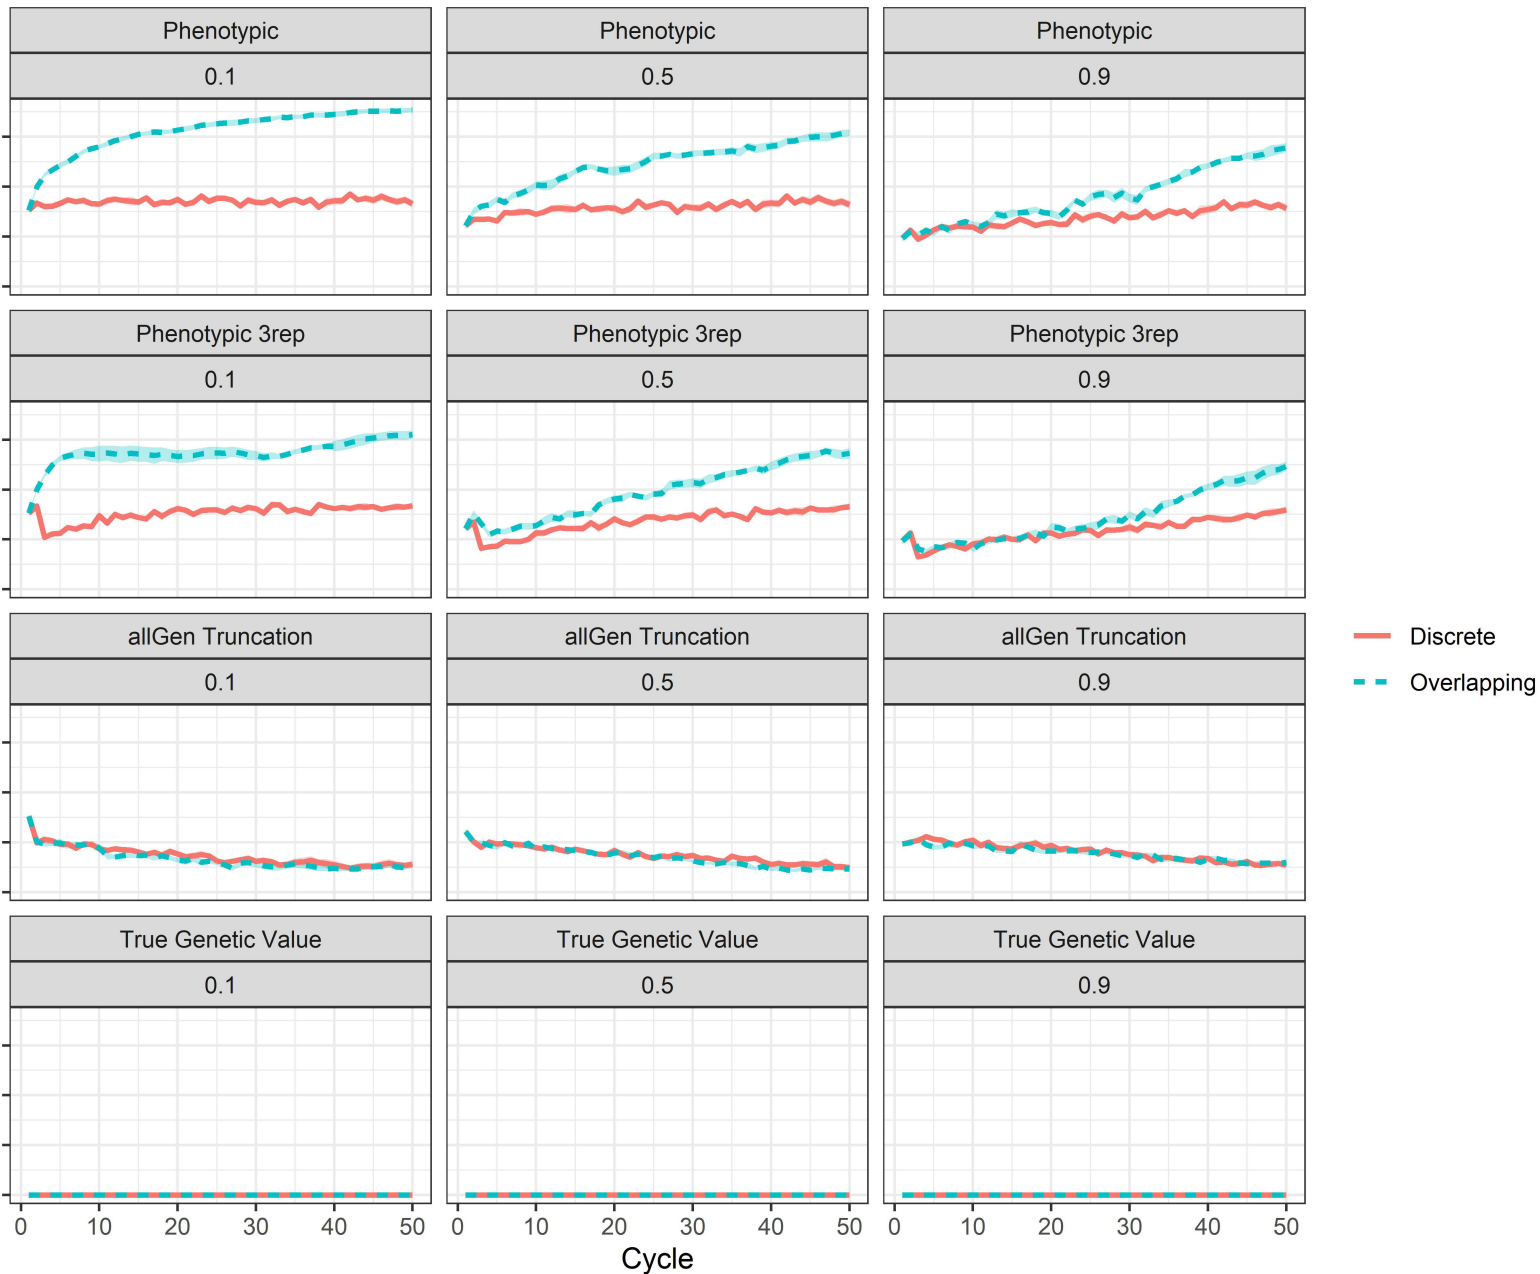

## RS-AY Selection Error Bias (Overall)

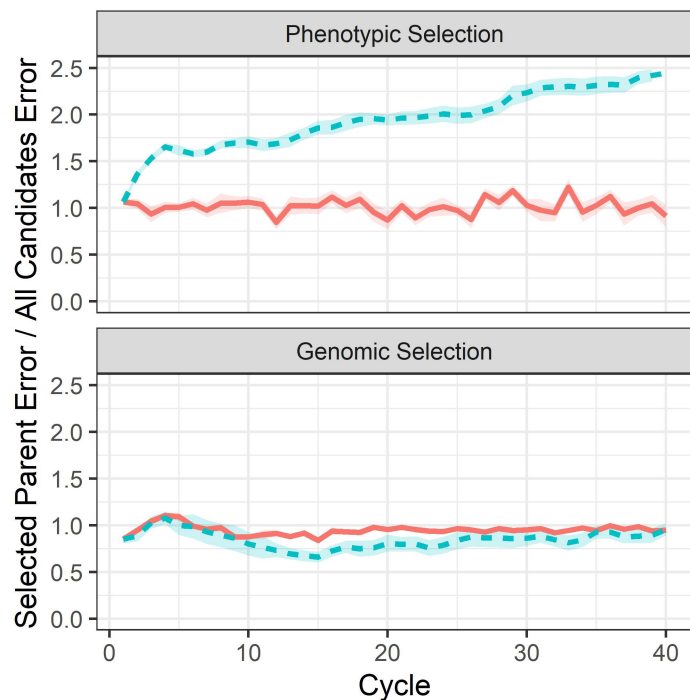

## RS-AY Additive x Year Error Bias

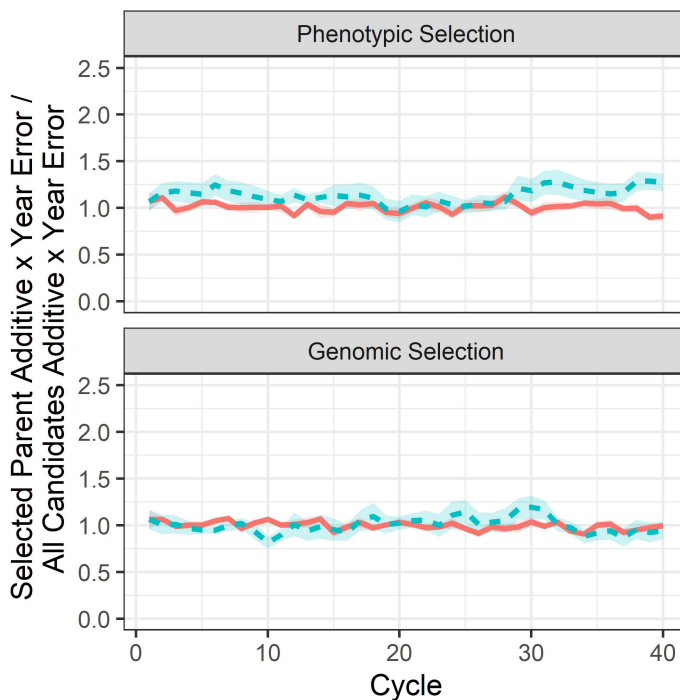

## RS-AY Year Error Bias

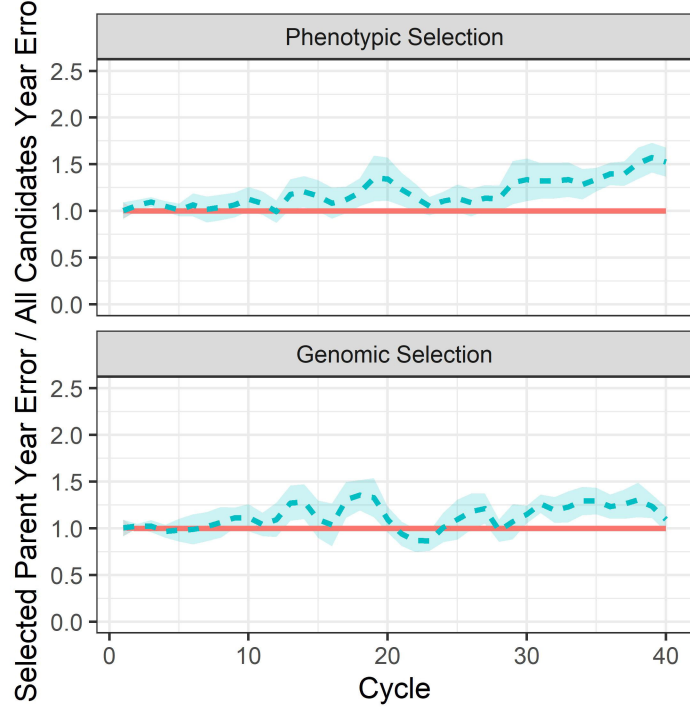

## RS-AY Plot Error Bias

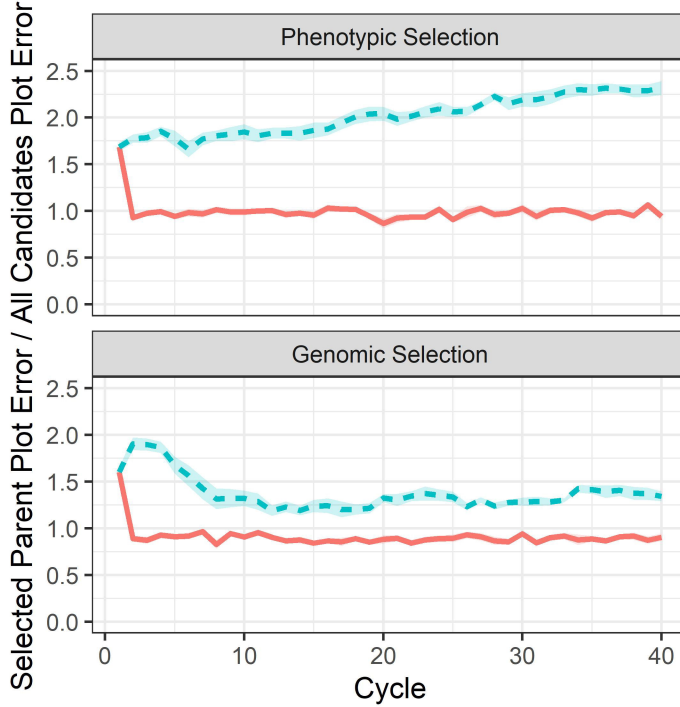

— Discrete  
 - - Overlapping

# Selection Error Bias

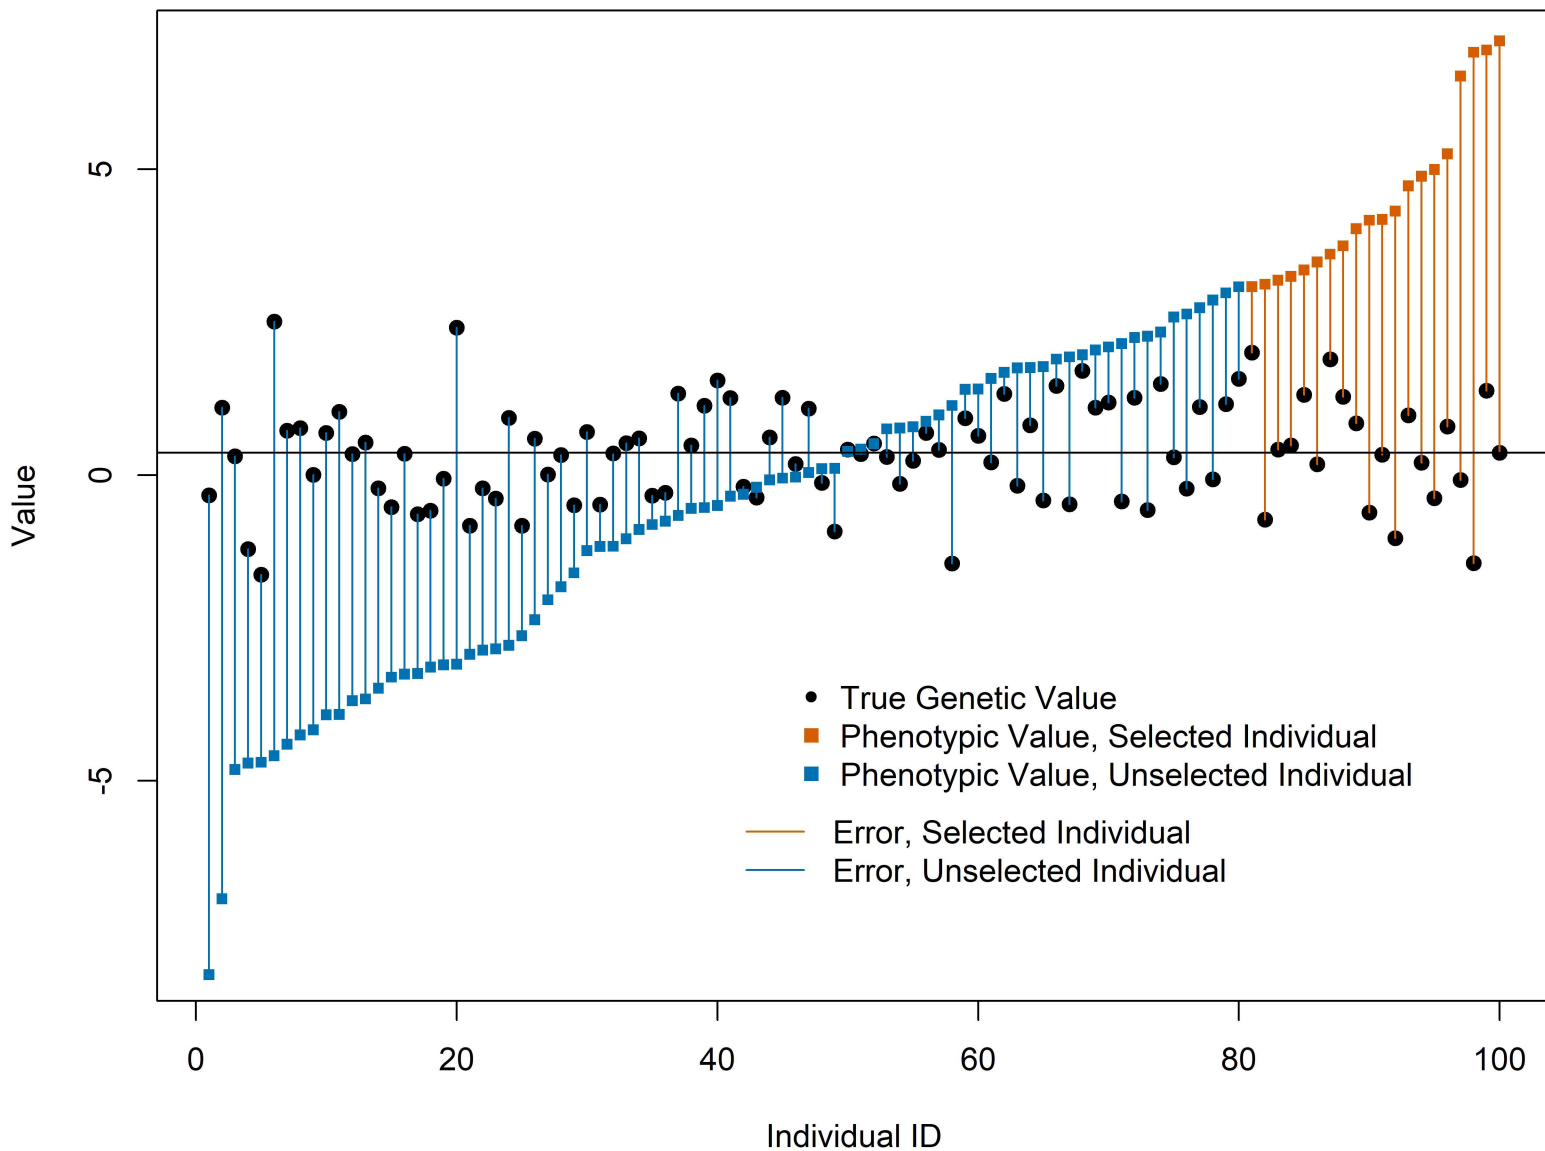

Source: https://www.biorxiv.org/content/10.1101/2021.10.12.464059v1.full.pdf
